# Supplementary material for: Tetracycline hydrochloride loaded regenerated cellulose composite membranes with controlled release and efficient antibacterial performance
Source: Royal Society of Chemistry journal article supplement (doi:10.1039/c5ra23409c), 2015-12-14
Supplement: c5ra23409c1.pdf [file c5ra23409c1.pdf]

## Supplementary information for

### **Tetracycline Hydrochloride loaded Regenerated Cellulose Composite**

#### **Membranes with Controlled Release and Efficient Antibacterial Performance**

Wei Shao,<sup>\*a†</sup> Shuxia Wang,<sup>a†</sup> Xiufeng Liu,<sup>b</sup> Hui Liu,<sup>a</sup> Jimin Wu,<sup>a</sup> Rui Zhang,<sup>\*a</sup>

Huihua Min<sup>c</sup> and Min Huang<sup>a</sup>

a. College of Chemical Engineering, Nanjing Forestry University, Nanjing 210037, P. R. China.

b. Jiangsu Key Laboratory of TCM Evaluation and Translational Research, China Pharmaceutical University, Nanjing 210009, P. R. China.

c. Advanced Analysis and Testing Center, Nanjing Forestry University, Nanjing 210037, P. R. China

Fax: +86-25-85418873; Tel: +86-25-85427024;

E-mail: w.shao@njfu.edu.cn (W. Shao); zhangrui@njfu.edu.cn (R. Zhang).

† Equal contributors.

## Experimental

### Mechanical property

The mechanical properties of RC and its composite membranes were tested according to the GB/T 1040.3-2006 standard. The stress-strain behaviors were measured by a dynamic mechanical analyzer (CMT4204, Shenzhen SANS Testing Machine Co., Ltd., China). Samples were cut manually by a razor blade into strips 30 mm×5 mm×~40 μm). The static tensile tests were conducted in a ramp displacement mode at a cross-head speed of 2 mm/min. Each sample was measured for at least five times. The average value was calculated and the error bars were calculated.

### Porosity calculation

The samples were infiltrated with 99% ethanol in a 25-mL beaker under -0.08MPa for 5 min in a vacuum oven. Subsequently, the tested sample was weighed in a 10-mL test tube and recorded as  $W_1$  and weighed again after ethanol was filled in the tube and recorded as  $W_2$ .  $V_0$  was calculated from Eq. (1):

$$V_0 = 10 - [(W_2 - W_1) / \rho_{\text{ethanol}}] \quad (1)$$

where  $\rho_{\text{ethanol}}$  is the density of ethanol and is 0.79 g/cm<sup>3</sup> at room temperature.

The density of the composite membrane ( $\rho_s$ ) was calculated with Eq. (2):

$$\rho_s = 1 / [(1 - \mu_{\text{TCH}}) / \rho_{\text{RC}} + \mu_{\text{TCH}} / \rho_{\text{TCH}}] \quad (2)$$

where  $\mu_{\text{TCH}}$  is the TCH weight fraction in the RC-TCH composite membrane;  $\rho_{\text{TCH}}$  refer to the densities of TCH and were 1.644 g/cm<sup>3</sup>. The porosity of the composites was calculated from Eq. (3):

$$\text{Porosity} = (1 - \rho_f / \rho_s) \times 100\% \quad (3)$$

The bulk density of the composite ( $\rho_f$ ) was calculated with Eq.(4):

$$\rho_f = W_0 / V_0 \quad (4)$$

where  $W_0$  is the weight of the composite and  $V_0$  is the volume of the composite.

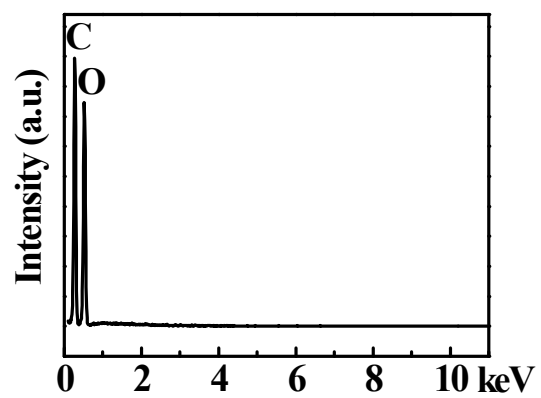

**Figure S1** EDS analysis of RC after seven days dialysis

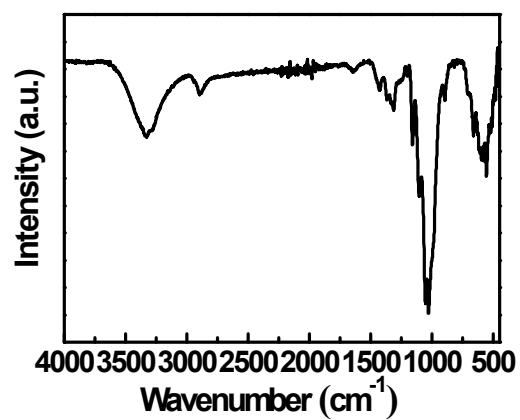

**Figure S2** FTIR spectrum of pristine MC

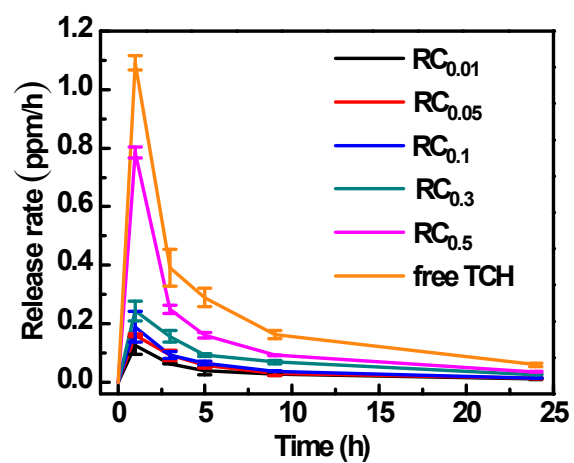

**Figure S3** Release rates of TCH in the PBS buffer at pH 7.4 (free TCH is the same amount as RC<sub>0.5</sub>).

**Table S1** The thickness, mechanical properties and porosity of RC and its composite

films with different TCH loadings.

| <b>Samples</b>           | <b>Thickness<br/>(<math>\mu\text{m}</math>)</b> | <b>Tensile<br/>strength (MPa)</b> | <b>Young's<br/>modulus (MPa)</b> | <b>Porosity<br/>(%)</b> |
|--------------------------|-------------------------------------------------|-----------------------------------|----------------------------------|-------------------------|
| <b>RC</b>                | 36.3 $\pm$ 0.3                                  | 16.51 $\pm$ 2.16                  | 1286 $\pm$ 226                   | 14.60                   |
| <b>RC<sub>0.01</sub></b> | 38.2 $\pm$ 0.3                                  | 16.62 $\pm$ 3.32                  | 1149 $\pm$ 230                   | 2.44                    |
| <b>RC<sub>0.05</sub></b> | 38.3 $\pm$ 0.3                                  | 17.10 $\pm$ 0.19                  | 1050 $\pm$ 251                   | 0.85                    |
| <b>RC<sub>0.1</sub></b>  | 38.8 $\pm$ 0.5                                  | 17.16 $\pm$ 1.50                  | 1174 $\pm$ 168                   | 0.21                    |
| <b>RC<sub>0.3</sub></b>  | 39.5 $\pm$ 0.4                                  | 17.25 $\pm$ 2.85                  | 1207 $\pm$ 140                   | 0.16                    |
| <b>RC<sub>0.5</sub></b>  | 39.7 $\pm$ 0.2                                  | 17.25 $\pm$ 4.09                  | 1156 $\pm$ 71                    | 0.09                    |
